# Supplementary material for: Facile preparation of amorphous photonic structure towards rapid temperature sensing and antibacterial textile
Source: Royal Society of Chemistry journal article supplement (doi:10.1039/d2ma00982j), 2022-11-29
Supplement: d2ma00982j1.pdf [file d2ma00982j1.pdf]

Electronic supplementary information

**Facile Preparation of Amorphous Photonic Structure towards Rapid Temperature Sensing and Antibacterial Textile**

Yun-Liang Ji, Lan-Xing Gao, and Yu Tian\*

Department of Chemistry, Key Laboratory of Surface & Interface Science of Polymer Materials of Zhejiang Province, Zhejiang Sci-Tech University, Hangzhou 310018, China.

\*Corresponding author.

Email address: tianyu\_zstu@zstu.edu.cn

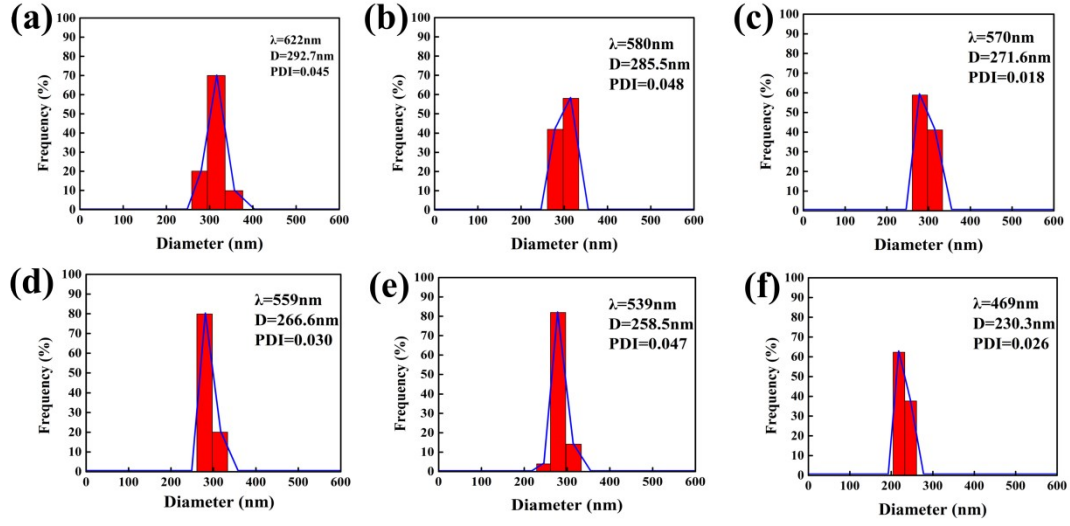

**Figure S1.** (a-f) Particle size distributions of P(St-BA-MAA) colloidal particles.

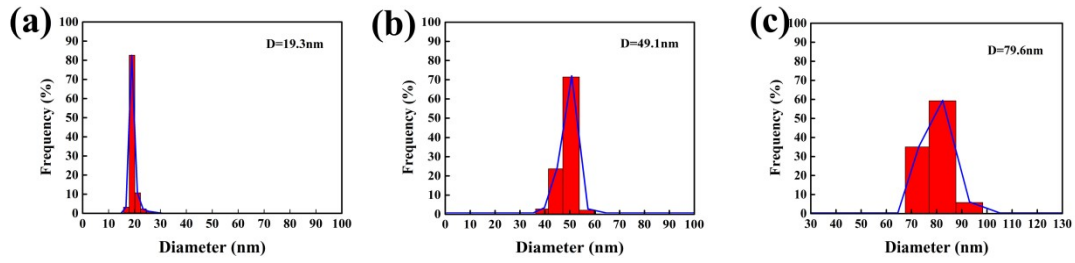

**Figure S2.** (a-c) Particle size distributions of silver nanoparticles.

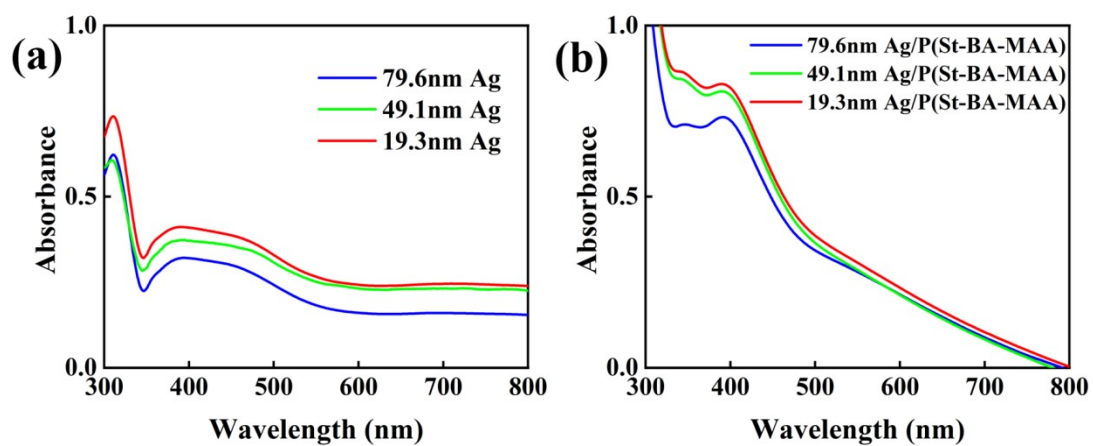

Figure S3. (a) Absorption spectra of Ag NPs powders. (b) Absorption spectra of mixtures of Ag/P(St-BA-MAA) with concentration both at 0.01wt%.

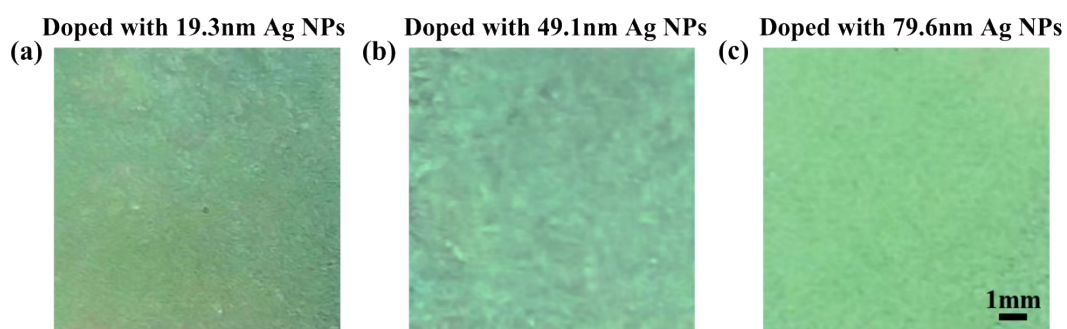

Figure S4. Photos of APS films doped with Ag NPs with diameter of (a)19.3 nm, (b) 49.1 nm, and (c) 79.6 nm, respectively.

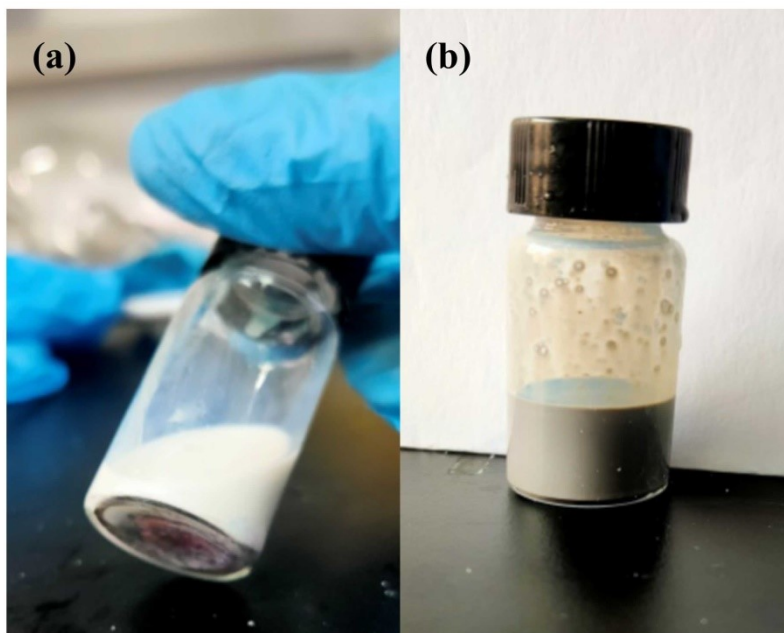

**Figure S5.** (a) Mixed emulsion of Ag NPs and colloidal particles without surfactant. (b) Mixed emulsion of Ag NPs and colloidal particles with surfactant.

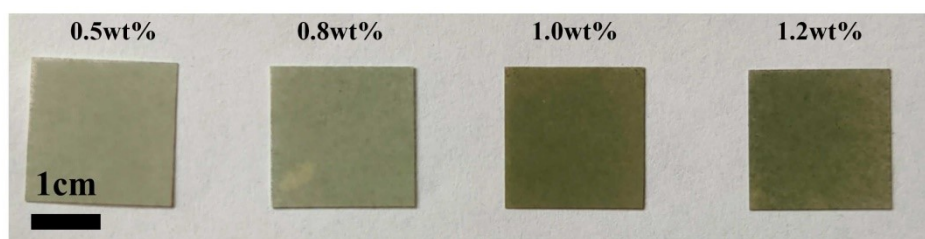

**Figure S6.** Comparison of structural color when the doping amount of Ag NPs is 0.5wt%, 0.8%, 1.0wt% and 1.2wt%.

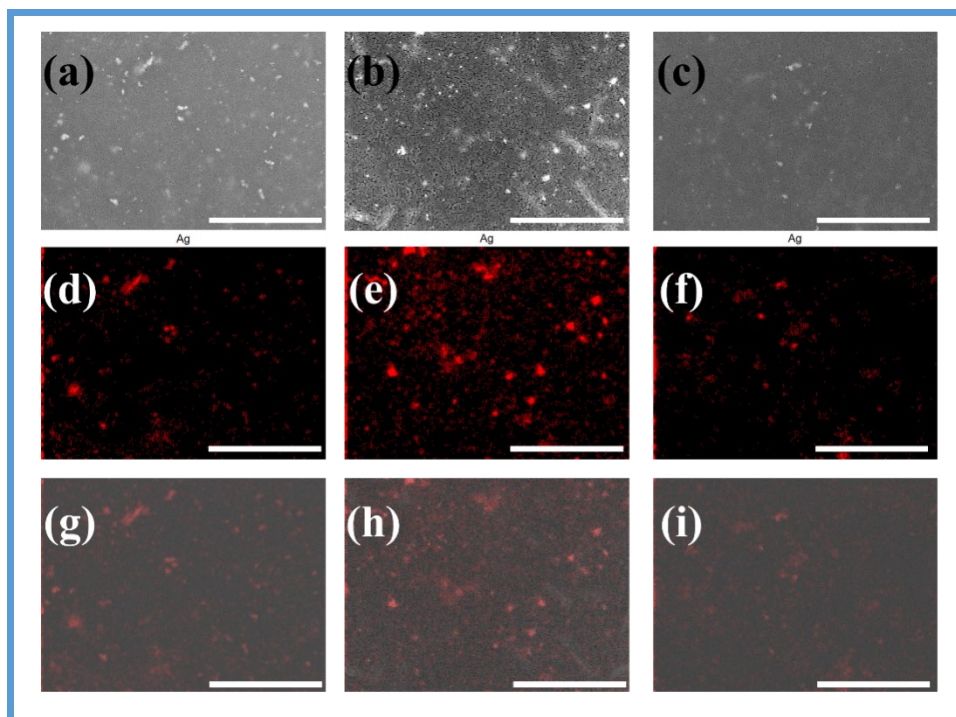

**Figure S7.** SEM images of (a) blue (b) green and (c) red APS film obtained by spray-coating method. (d-f) Element mapping for Ag in the APS films of (a-c) and their merged pictures (g-i). Scale bar: 10  $\mu\text{m}$ .

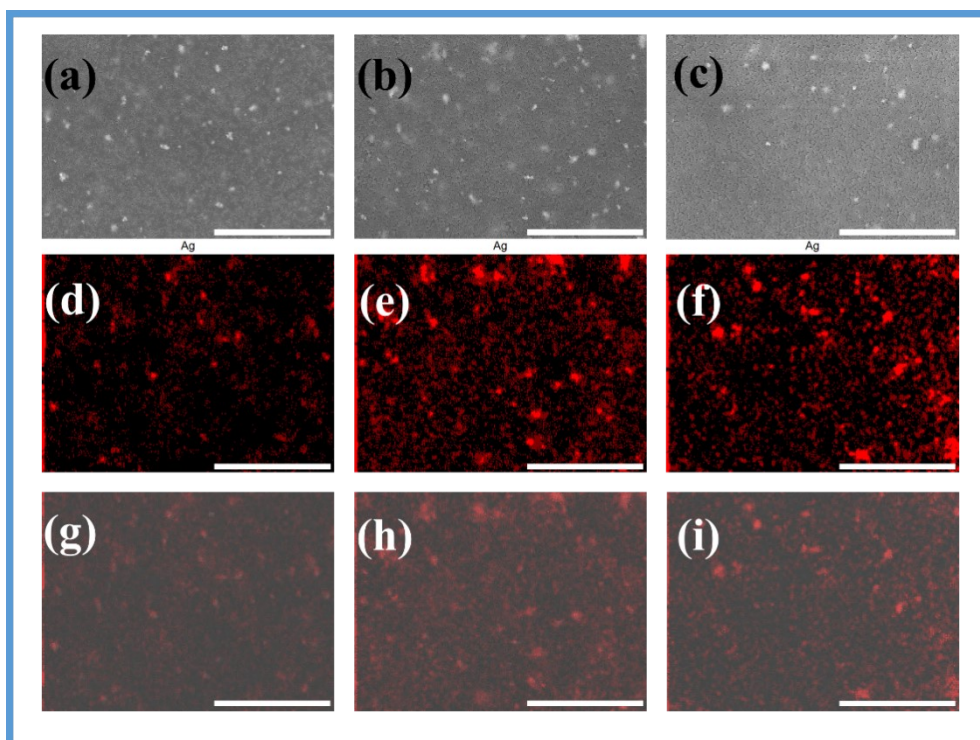

**Figure S8.** SEM images of (a) blue (b) green (c) red APS film obtained by hand-writing method. (d-f) Element mapping for Ag in the APS film of (a-c) and their merged pictures (g-i). Scale bar: 10  $\mu\text{m}$ .

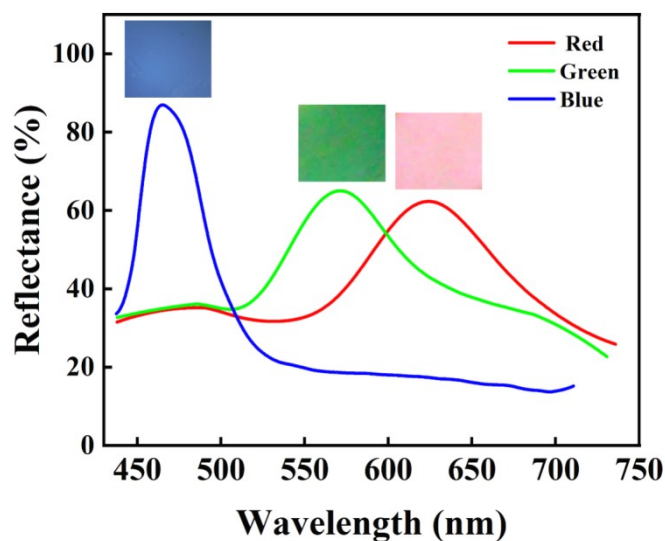

**Figure S9.** Reflection spectra of photonic crystal films composed of single particles.

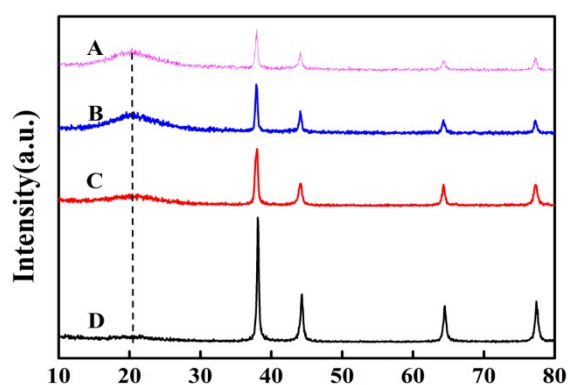

**Figure S10.** XRD diagram. A: APS/Ag film powder placed in air for 5 days; B: Ag NPs powder placed in air for 5 days; C: newly prepared APS/Ag film powder; D: fresh Ag NPs powder.

We conducted a group of XRD tests about fresh Ag NPs powder, Ag NPs placed in air for 5 days, APS/Ag film placed in air for 5 days, and newly prepared APS/Ag film to examine whether the Ag NPs oxidized. We found that distinct diffraction peaks at  $38.2^\circ$ ,  $44.4^\circ$ ,  $64.5^\circ$ ,  $77.5^\circ$  appeared in all the XRD patterns of the four samples, which were indexed to the (111), (200), (220) and (311) reflections of Ag NPs. The new broad peak at  $22^\circ$  for the samples of APS/Ag attributed to the amorphous structure of the polymer<sup>1,2</sup>. No diffraction peaks attributed to  $\text{Ag}_2\text{O}$  were presented, suggesting that Ag NPs played a decisive role in improving the structural color saturation of the APS films.



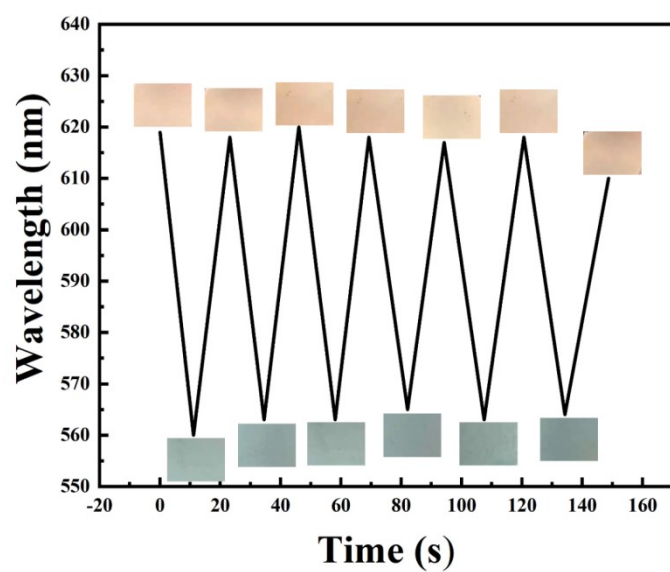

**Figure S11.** Six cycle diagram of hydrogel temperature sensor at 24 °C and 38°C.

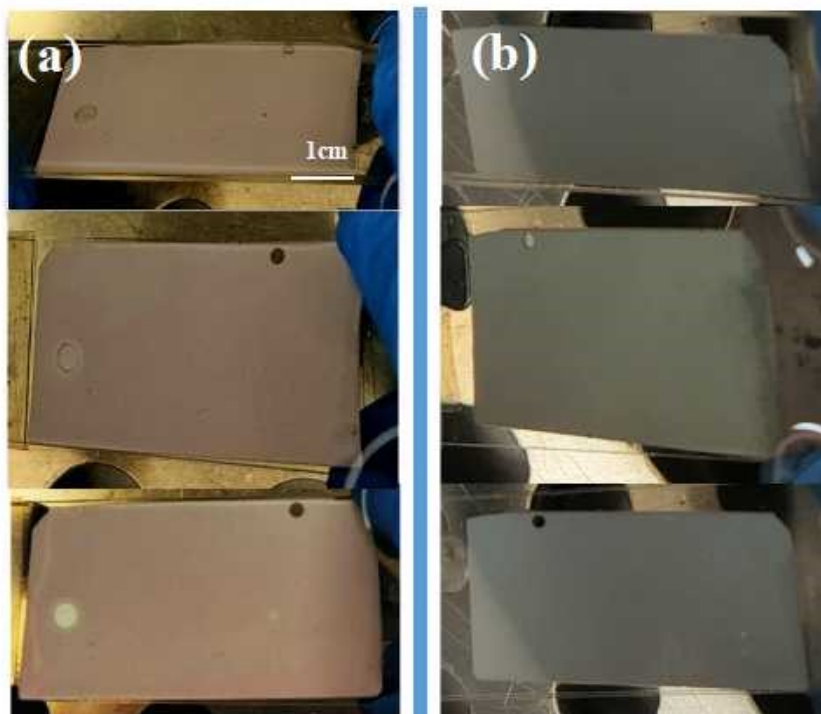

**Figure S12.** Angle-dependence of composite APS-Ag hydrogel temperature sensor. (a) The sensor shows angle-independence at the temperature of 24 °C.(b) The sensor shows angle-independence at the temperature of 38 °C.

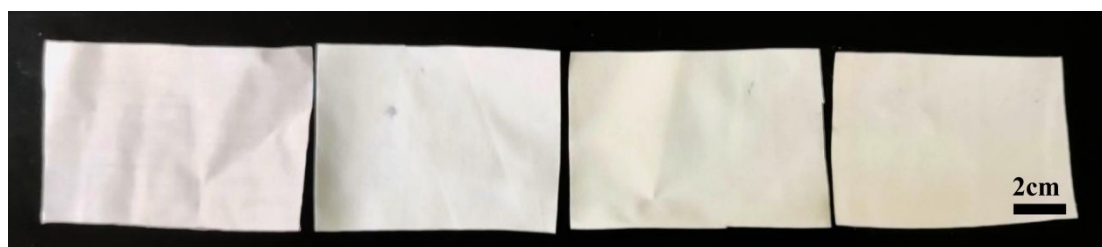

**Figure S13.** Photos of APS textiles, from left to right, are: original textile, blue APS textile, green APS textile and red APS textile.

**Table S1.** Reflected wavelength, particle size and PDI of colloidal particles.

| Wavelength | Particle size | PDI   |
|------------|---------------|-------|
| 622nm      | 292.7nm       | 0.045 |
| 580nm      | 285.5nm       | 0.048 |
| 570nm      | 271.6nm       | 0.018 |
| 559nm      | 266.6nm       | 0.030 |
| 539nm      | 258.5nm       | 0.047 |
| 469nm      | 230.3nm       | 0.026 |

## References

1. D. C. Corsino and M. D. L. Balela, *IOP Conf. Ser.: Mater. Sci. Eng.*, 2017, **264**, 012020.
2. A. Q. Xie, J. Z. Guo, L. L. Zhu and S. Chen, *Chem. Eng. J.*, 2021, **415**, 128950.
